# Supplementary material for: Coupling reaction between CO2 and cyclohexene oxide: selective control from cyclic carbonate to polycarbonate by ligand design of salen/salalen titanium complexes
Source: Royal Society of Chemistry journal article supplement (doi:10.1039/c4cy00752b), 2014-01-01
Supplement: c4cy00752b1.pdf [file c4cy00752b1.pdf]

## Supplementary Information

### Coupling Reaction between CO<sub>2</sub> and Cyclohexene Oxide: Selective Control from Cyclic Carbonate to Polycarbonate by Ligand Design of Salen/Salalen Titanium Complexes

Yong Wang,<sup>a,b</sup> Yusheng Qin,<sup>\*a</sup> Xianhong Wang,<sup>\*\*a</sup> and Fosong Wang<sup>a</sup>

<sup>a</sup> Key Laboratory of Polymer Ecomaterials, Changchun Institute of Applied Chemistry, Chinese Academy of Sciences, Changchun 130022, People's Republic of China.

<sup>b</sup> University of Chinese Academy of Sciences, Beijing 100039, People's Republic of China.

\*Corresponding author at: Key Laboratory of Polymer Ecomaterials, Changchun Institute of Applied Chemistry, Chinese Academy of Sciences, Changchun 130022, People's Republic of China. Fax: +86 0431 85262252; Tel: +86 0431 85262252, E-mail addresses: ysqin@ciac.jl.cn.

\*\*Corresponding author at: Key Laboratory of Polymer Ecomaterials, Changchun Institute of Applied Chemistry, Chinese Academy of Sciences, Changchun 130022, People's Republic of China. Fax: +86 0431 85689095; Tel: +86 0431 85262250, E-mail addresses: xhwang@ciac.jl.cn.

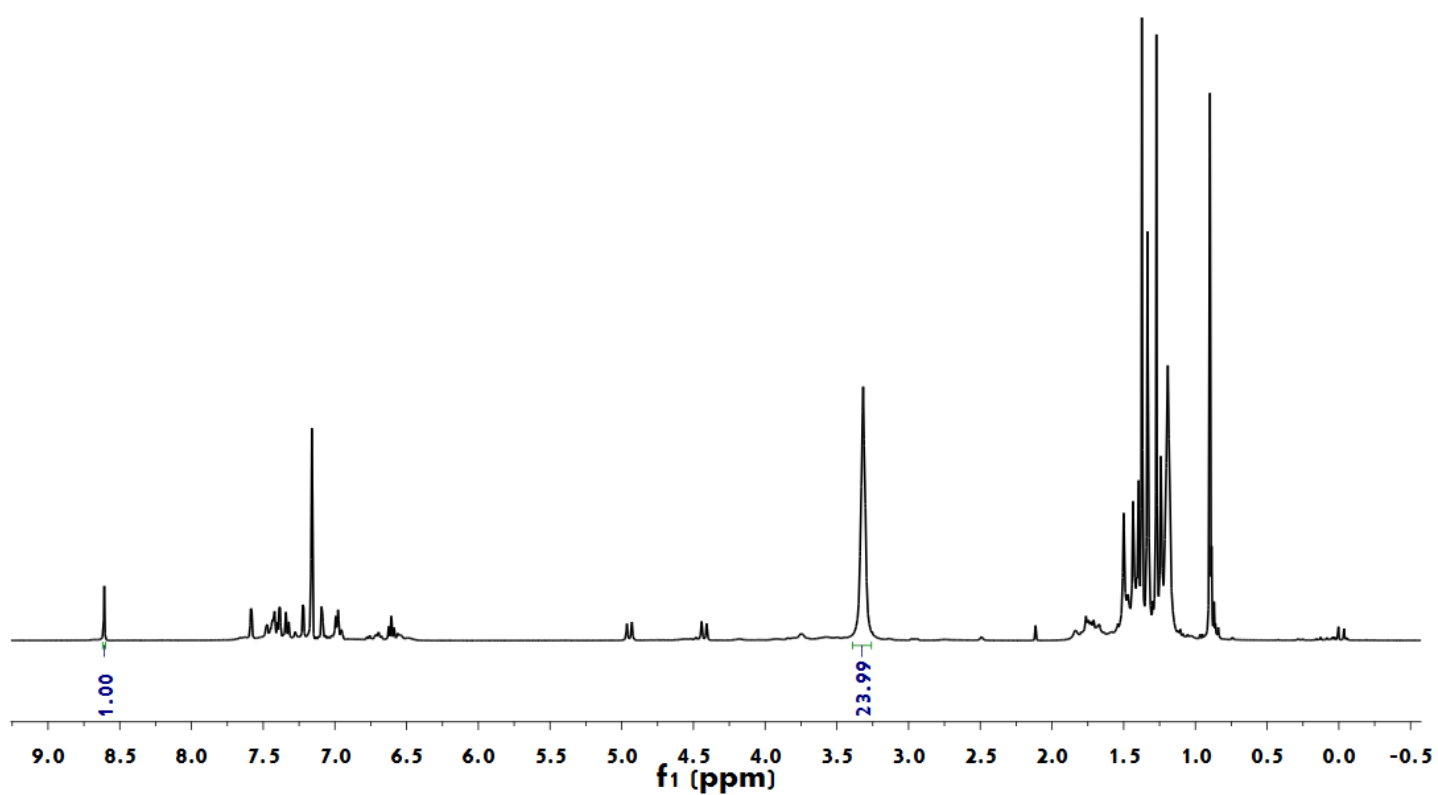

**Fig. S1**  $^1\text{H}$  NMR spectrum of the lithium salt of salalen ( $\text{C}_6\text{D}_6$ ), the integral area of 1.00 stands for one H on the ligand ( $-\text{CH}=\text{N}-$ ), thus the peak at 3.32ppm with an integral area of 23.99 stands for 24 H corresponding to hydrogen on THF( $-\text{O}-\text{CH}_2-$ ) corresponding to 6 THF.

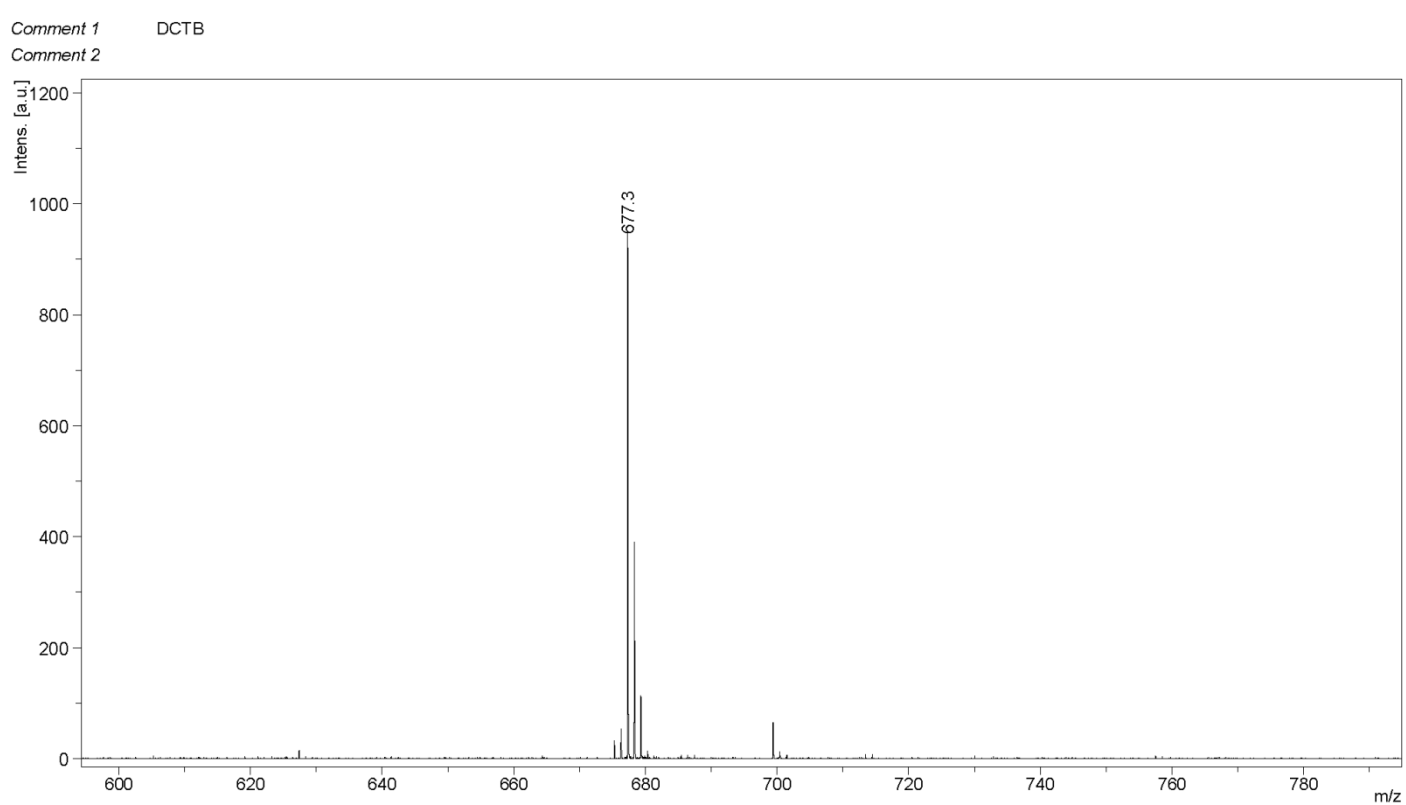

**Fig. S2** MALDI-TOF-MS of complex **2**, DCTB, (2-[(2E)-3-(4-tert-butylphenyl)-2-Methylprop-2-enylidene] malononitrile) as matrix,  $m/z$  677.3<sup>+</sup> is corresponding to  $[(\text{Salalen})\text{Ti}(\text{THF})\text{Cl}-\text{Cl}+\text{H}_2\text{O}]^+$ .

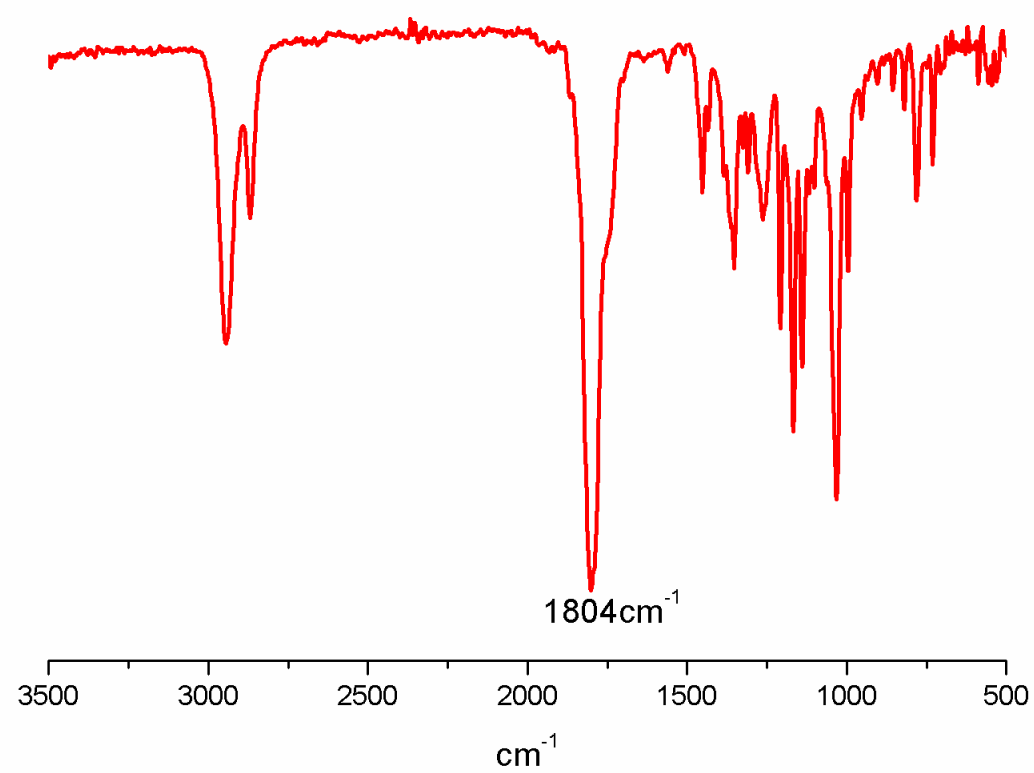

Fig. S3 FTIR spectrum of *cis*-CHC, peak at  $1804\text{cm}^{-1}$  stands for the carbonyl stretching frequency.

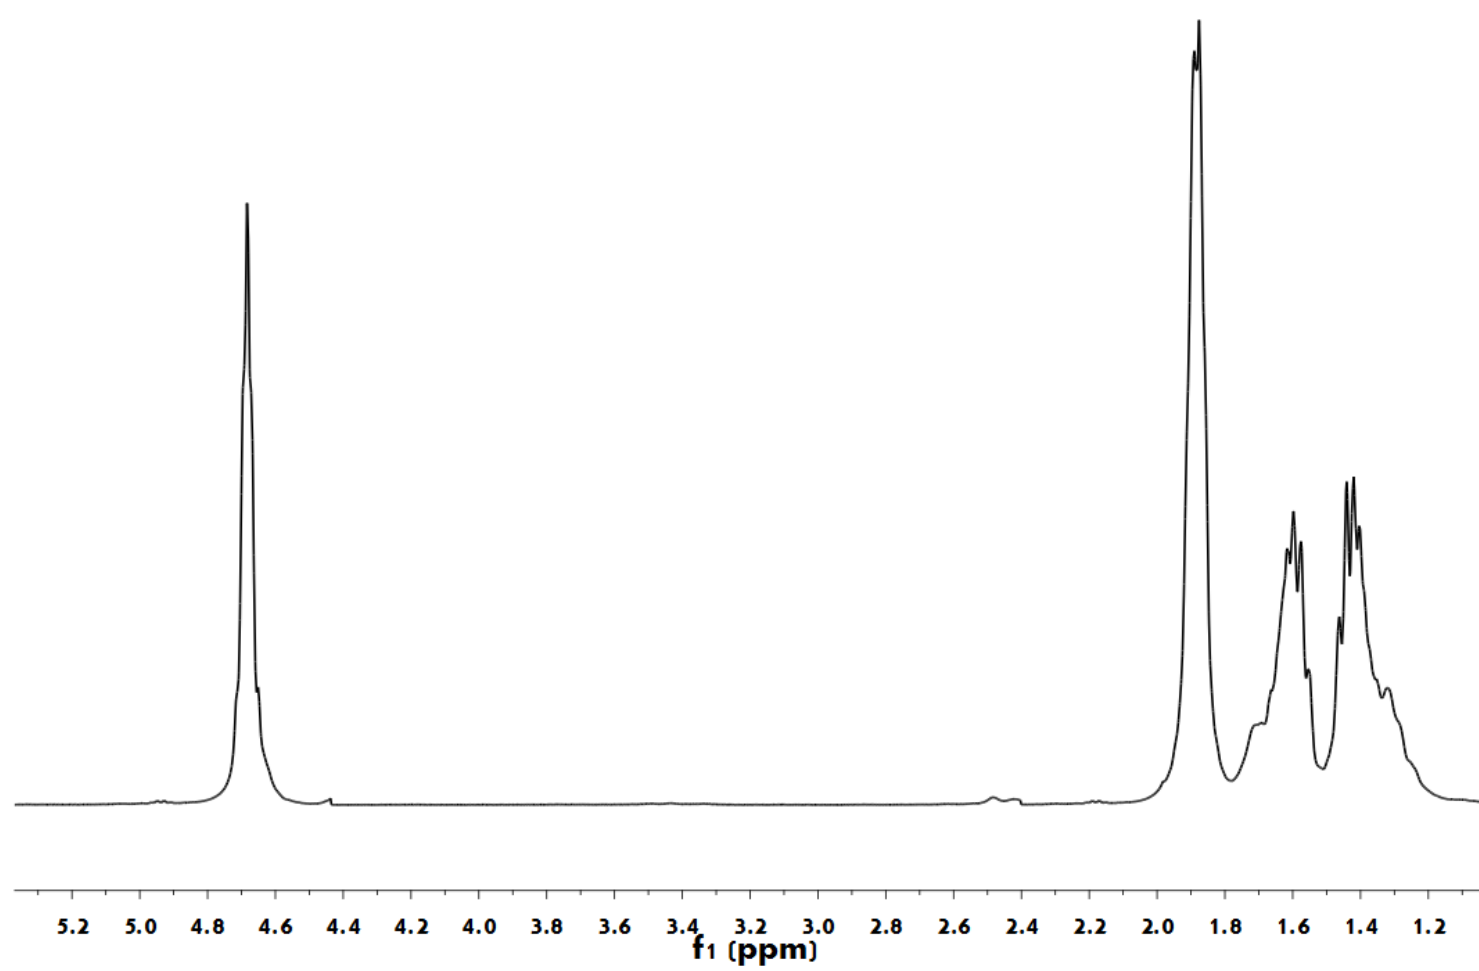

Fig. S4  $^1\text{H}$  NMR spectrum of *cis*-CHC ( $\text{CDCl}_3$ ).

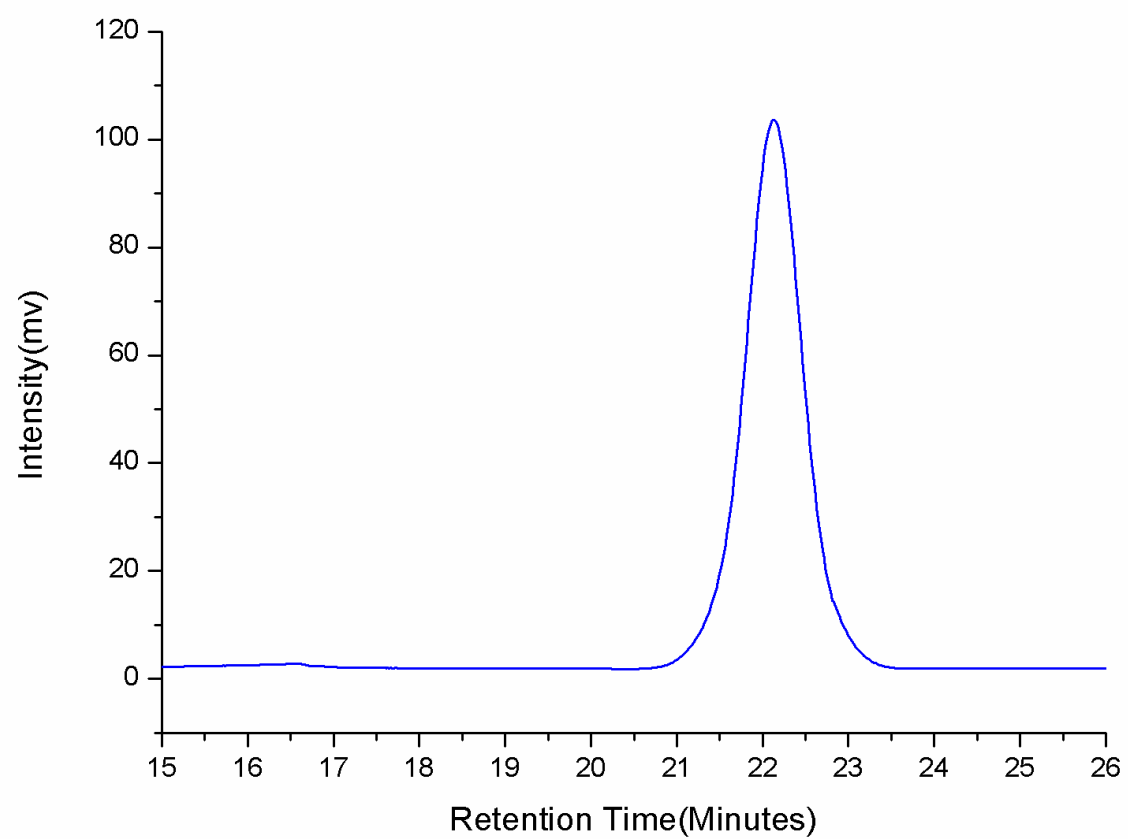

Fig. S4 GPC traces for PCHC produced using complex **2**, (Table 2 entry 11,  $M_n$  : 6000,  $M_w/M_n$  = 1.11) ( $\text{CH}_2\text{Cl}_2$  eluent).

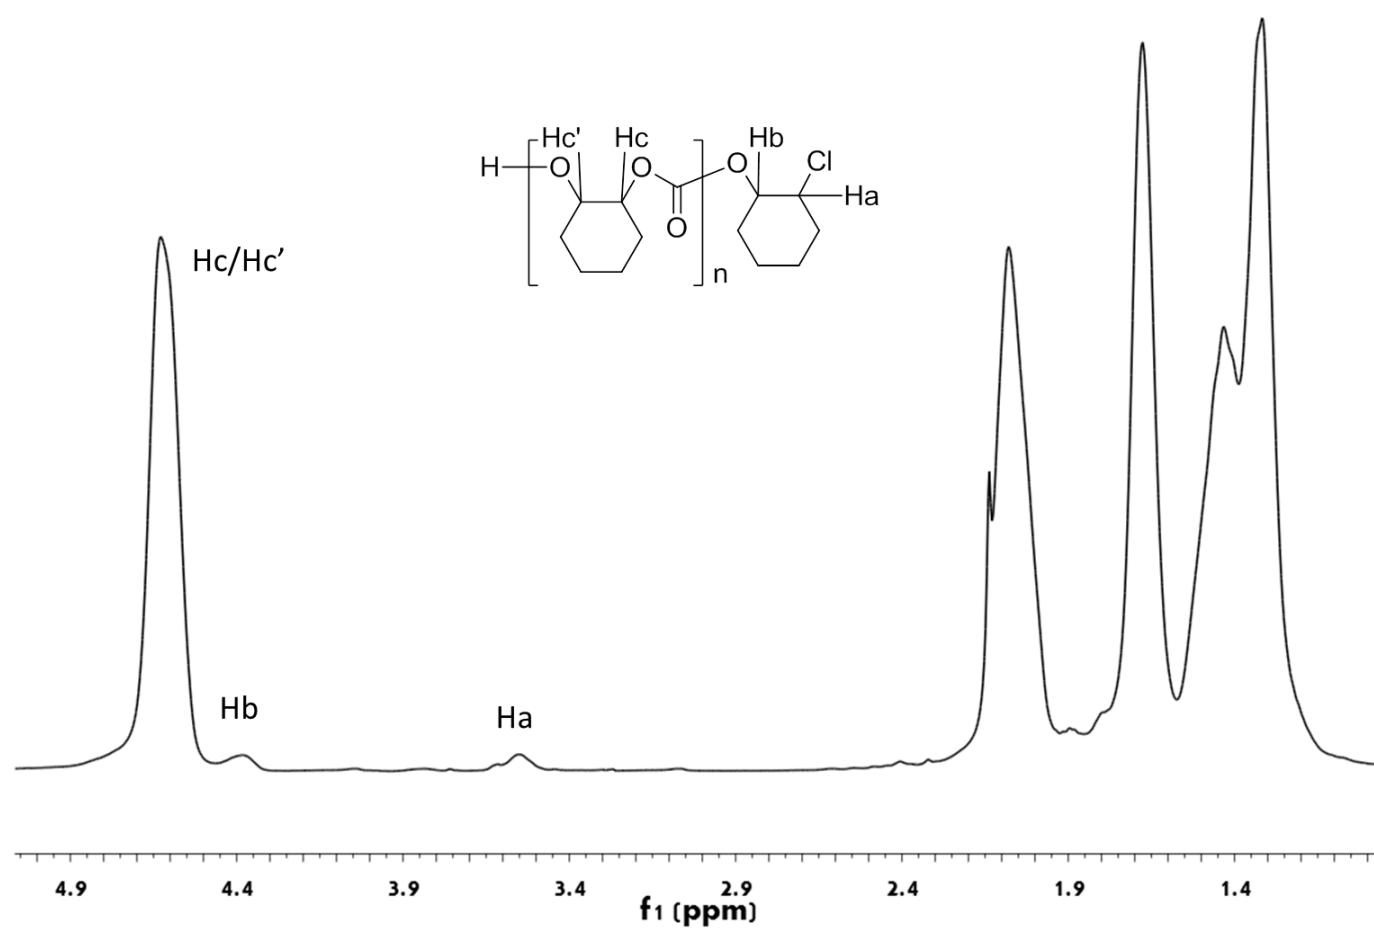

Fig. S5  $^1\text{H}$  NMR spectrum of the PCHC (Table 2, entry 11) ( $\text{CDCl}_3$ ).

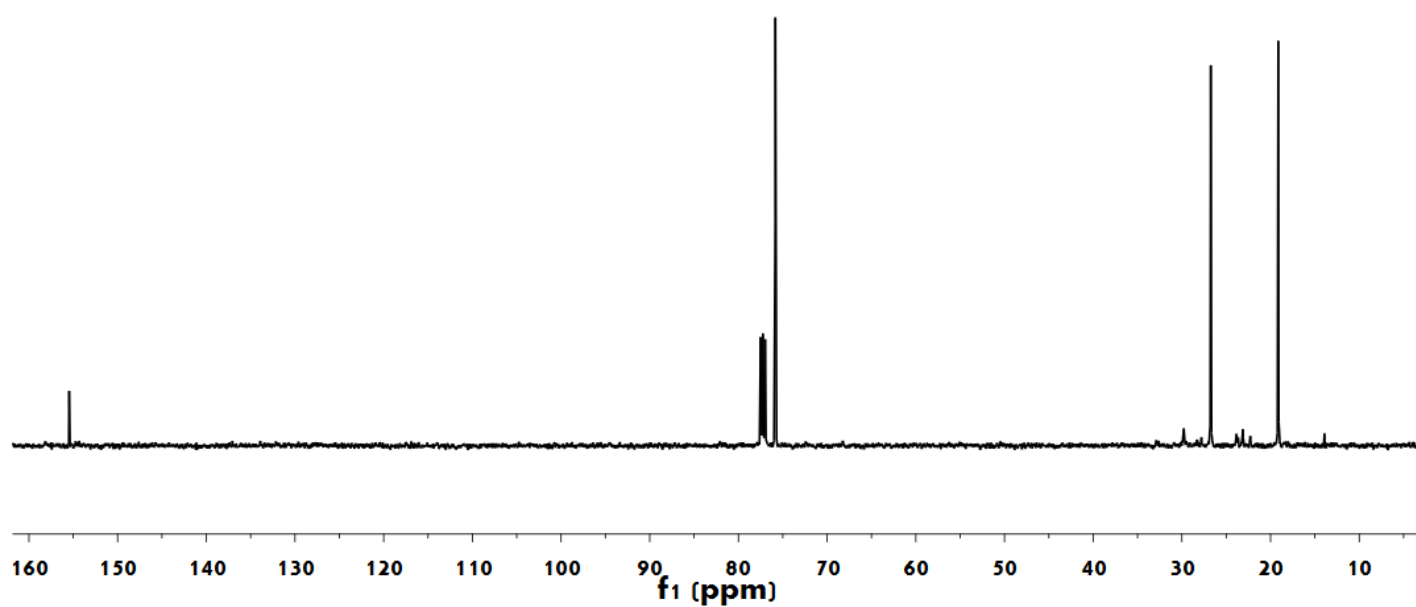

Fig. S7  $^{13}\text{C}$  NMR spectrum of *cis*-CHC ( $\text{CDCl}_3$ ).

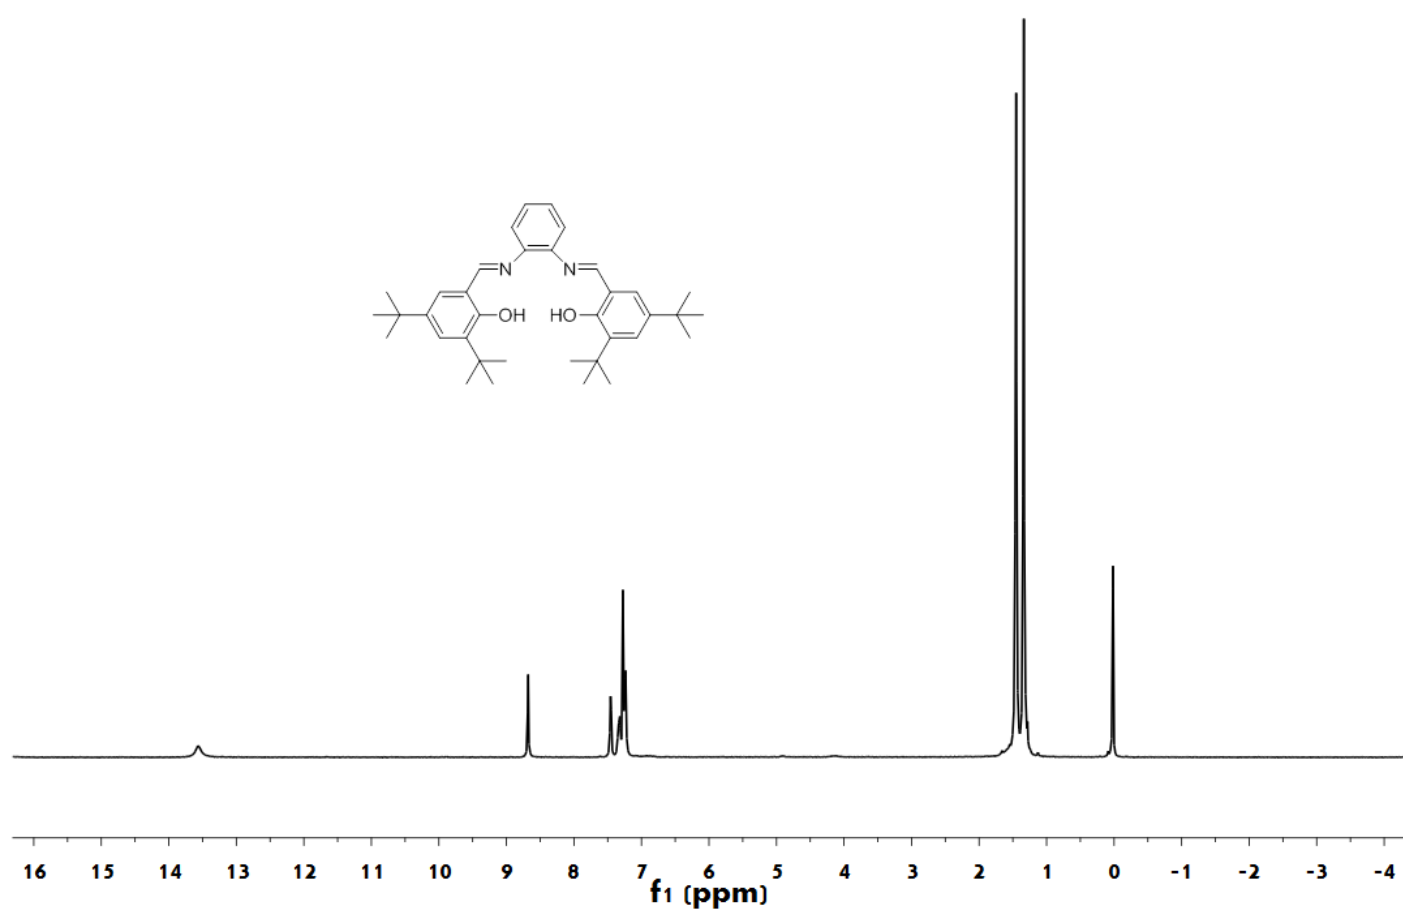

Fig. S8  $^1\text{H}$  NMR spectrum of salen ligand ( $\text{CDCl}_3$ )

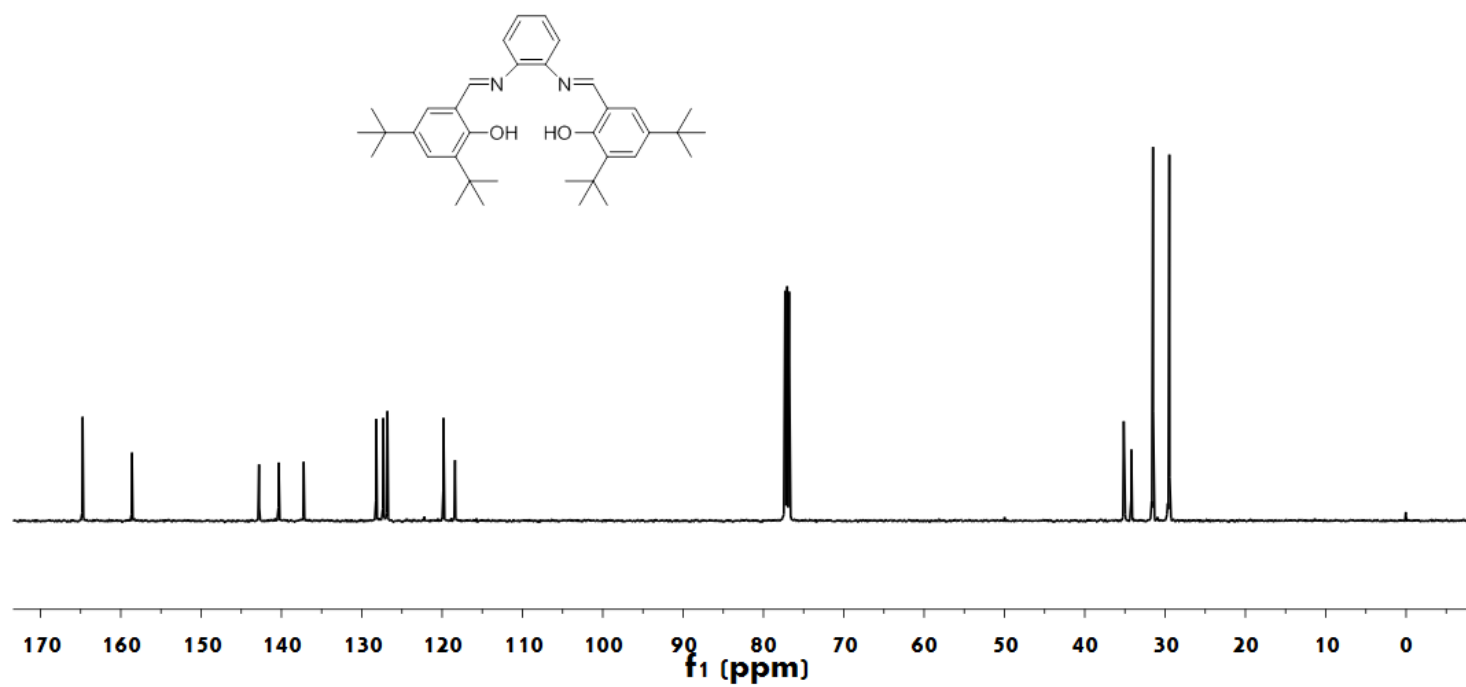

Fig. S9  $^{13}\text{C}$  NMR spectrum of salen ligand( $\text{CDCl}_3$ )

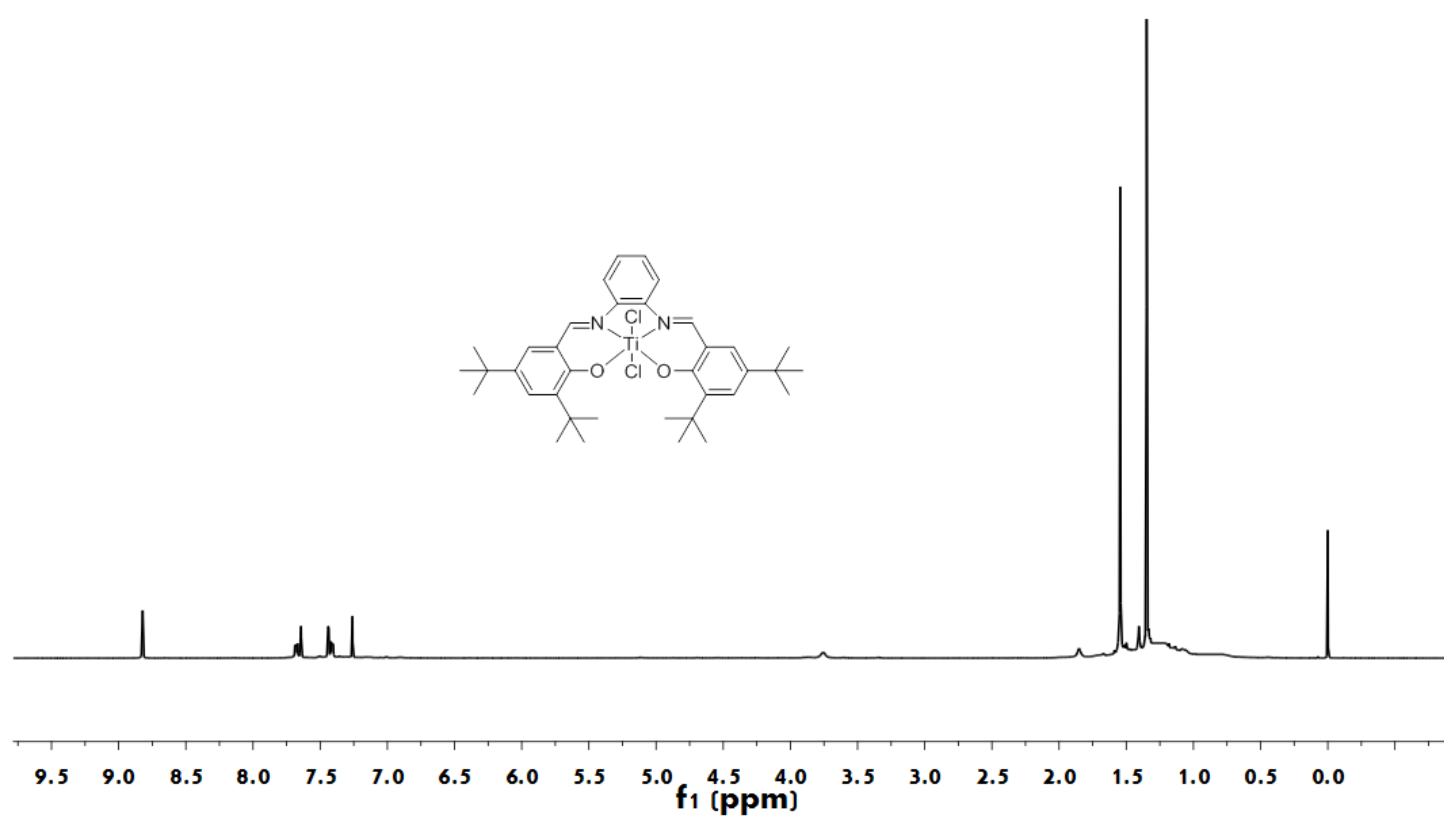

Fig. S10  $^1\text{H}$  NMR spectrum of  $(\text{Salen})\text{Ti}(\text{IV})\text{Cl}_2$ ( $\text{CDCl}_3$ )

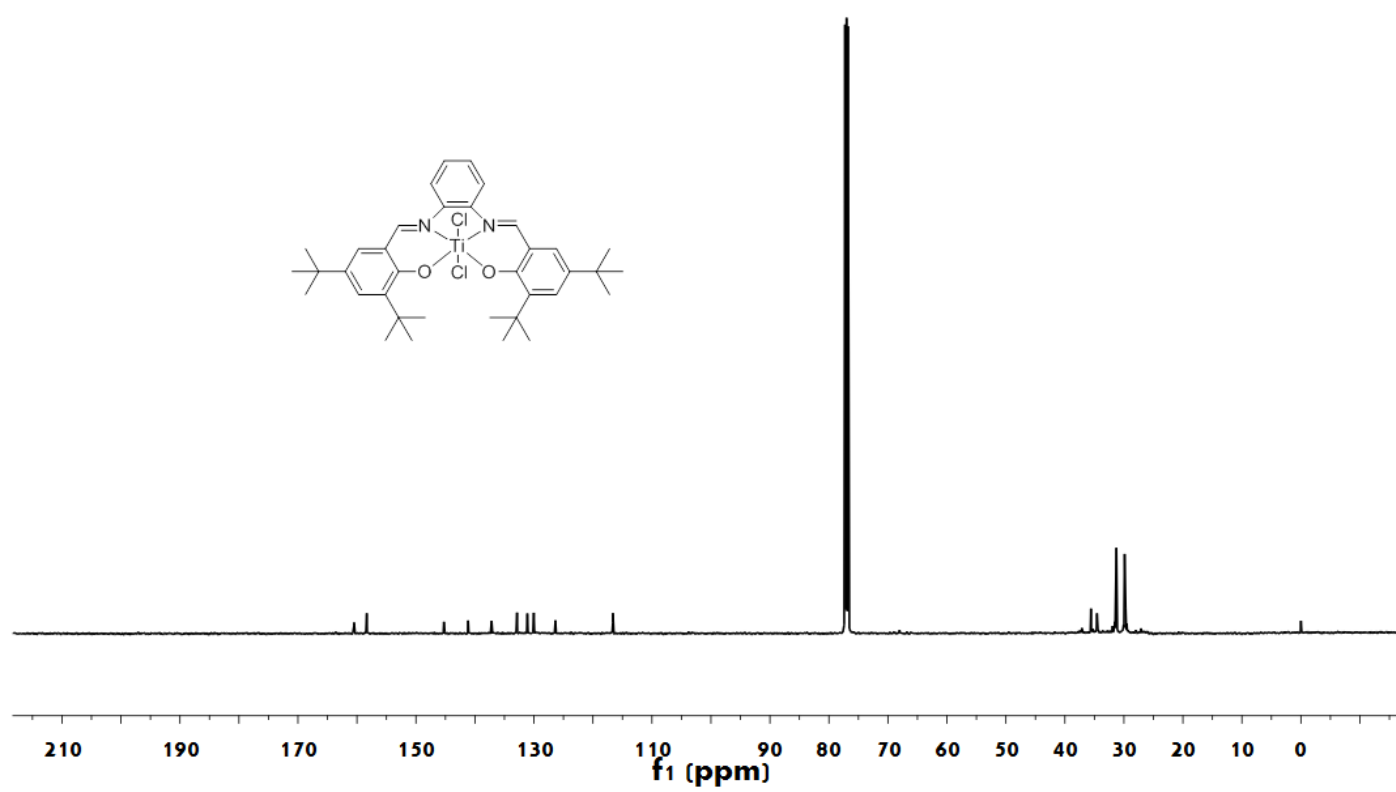

Fig. S11 <sup>13</sup>C NMR spectrum of (Salen)Ti(IV)Cl<sub>2</sub>(CDCl<sub>3</sub>)

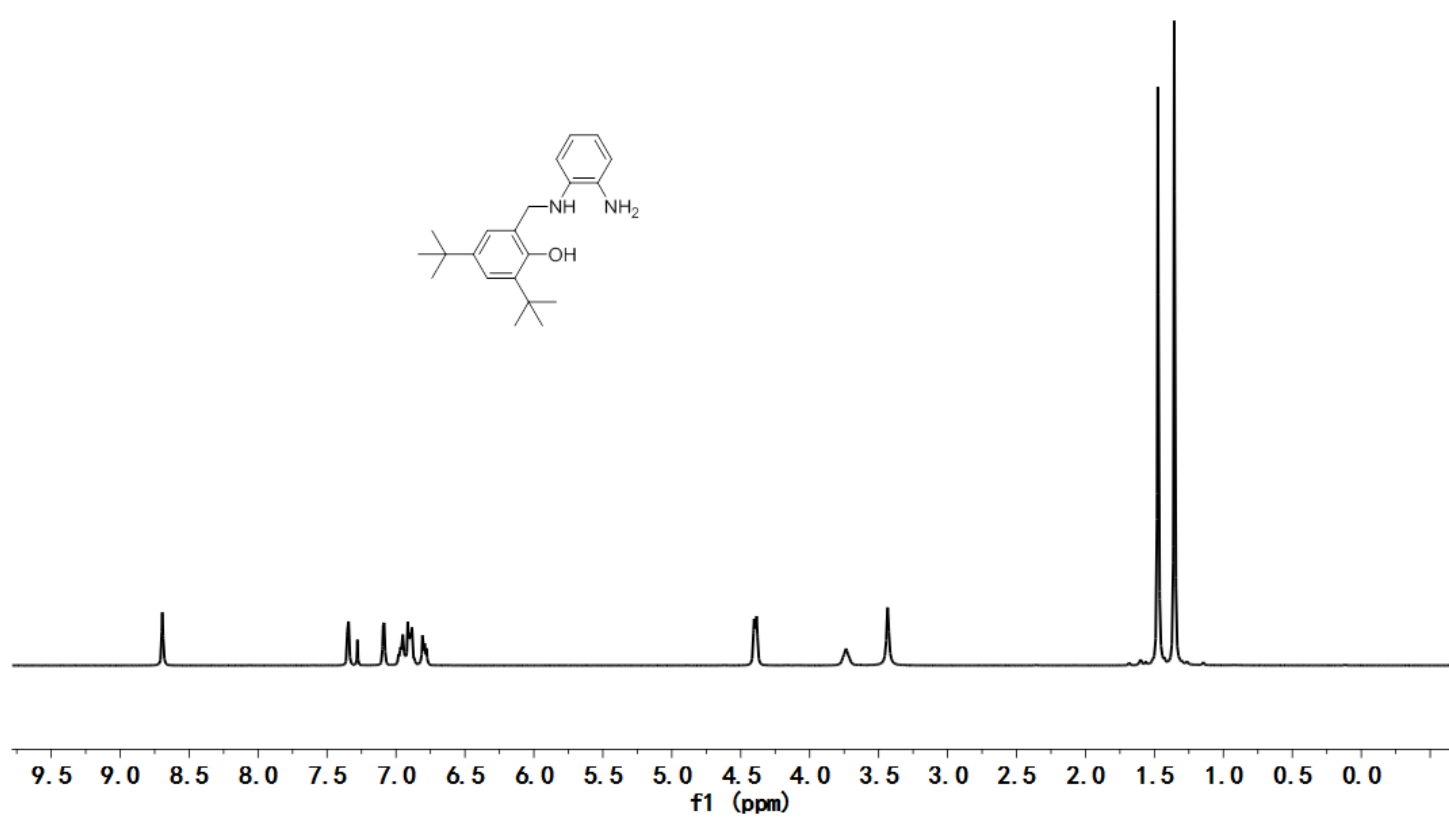

Fig. S12 <sup>1</sup>H NMR spectrum of compound **b** (CDCl<sub>3</sub>)

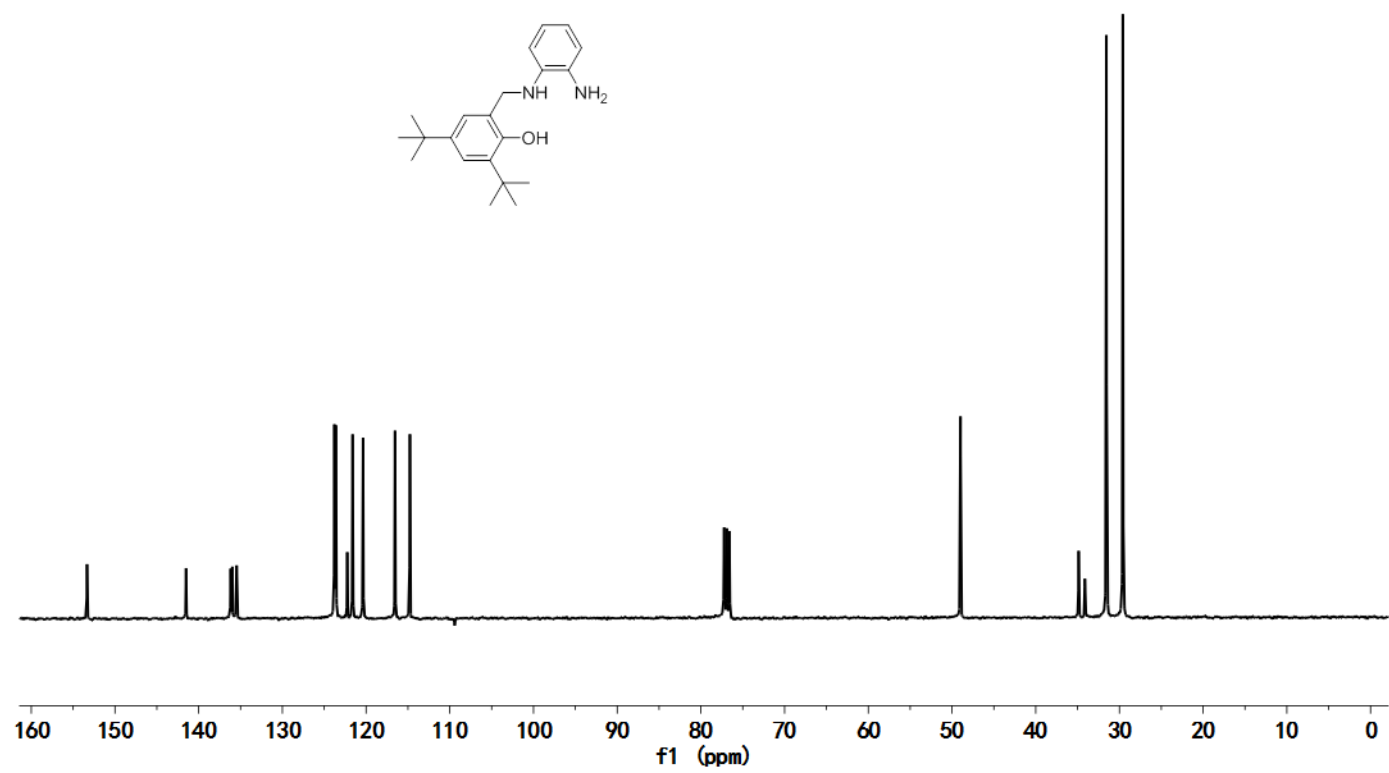

Fig. S13 <sup>13</sup>C NMR spectrum of compound **b** (CDCl<sub>3</sub>)

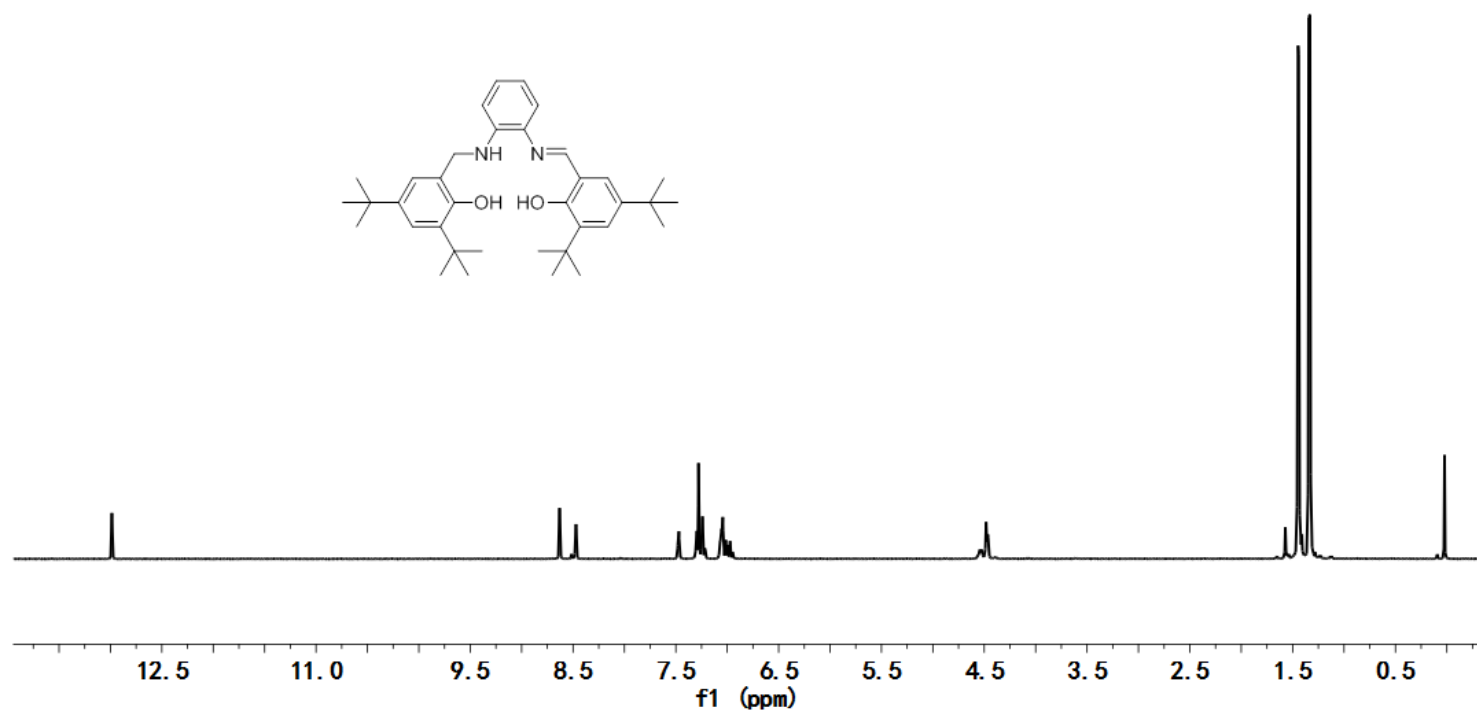

Fig. S14 <sup>1</sup>H NMR spectrum of salalen ligand (CDCl<sub>3</sub>)



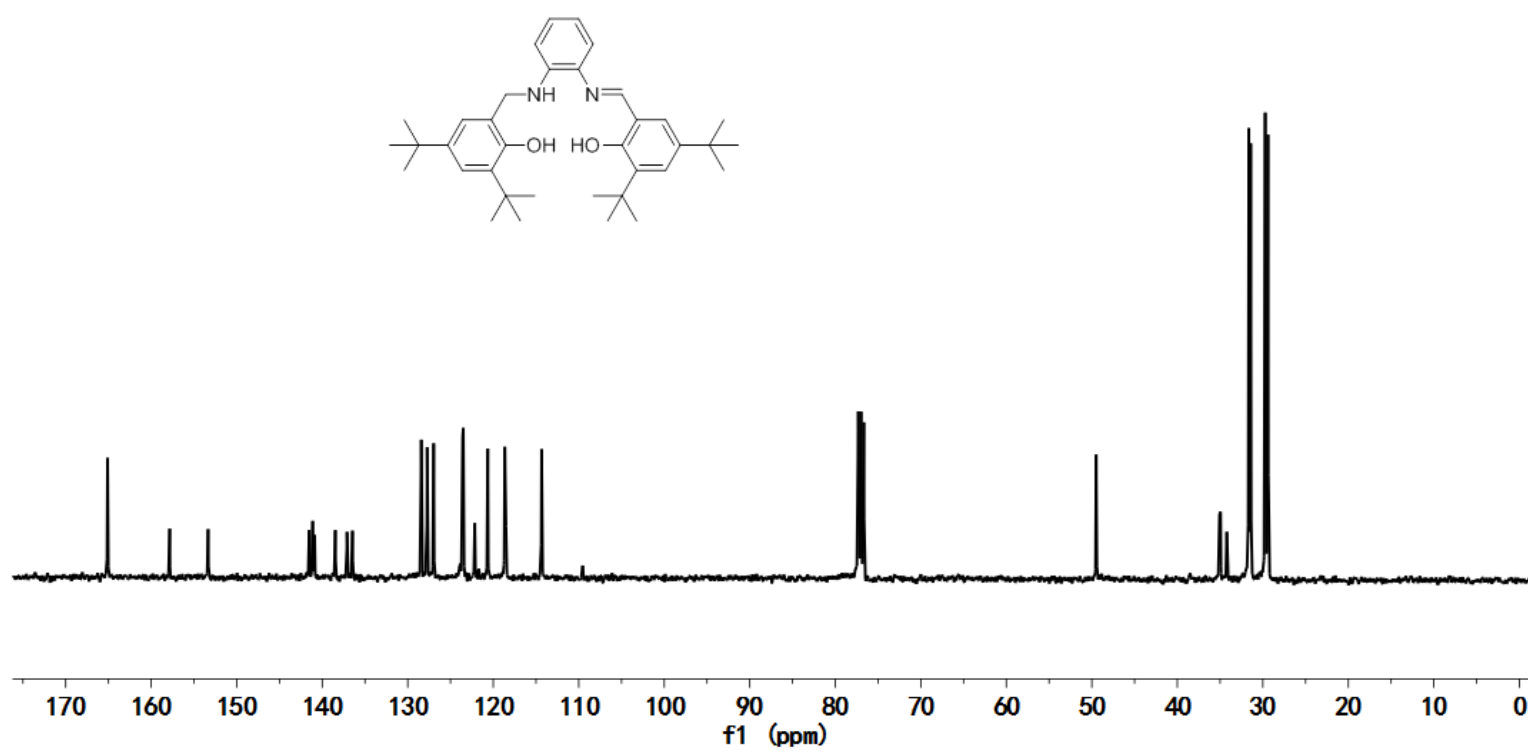

Fig. S15 <sup>13</sup>C NMR spectrum of salalen ligand (CDCl<sub>3</sub>)

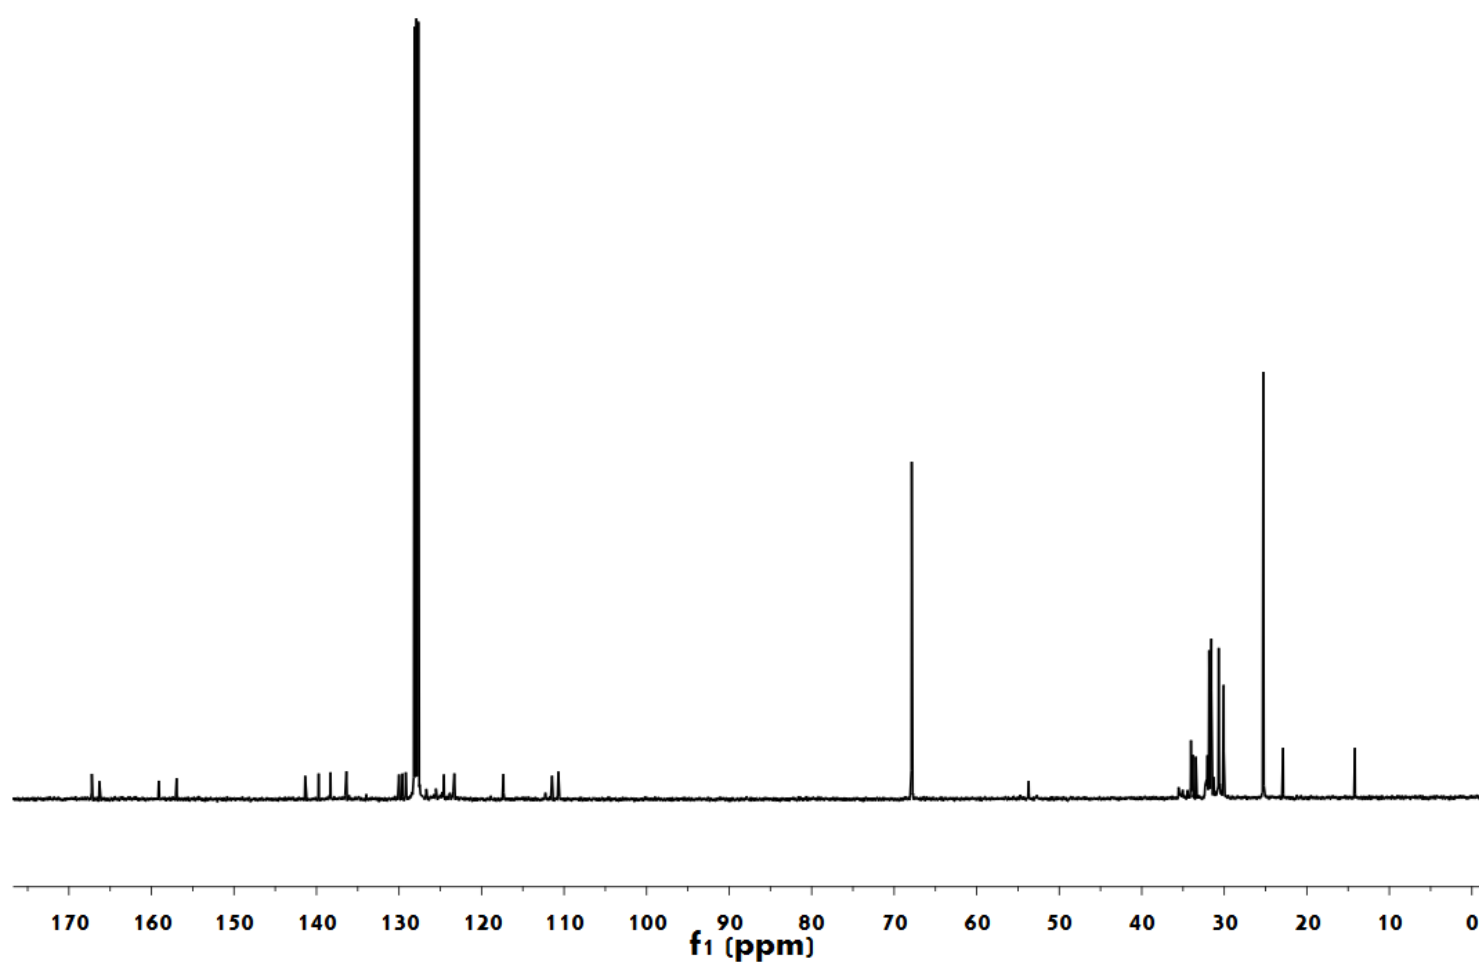

Fig. S16 <sup>13</sup>C NMR spectrum of the lithium salt of salalen (C<sub>6</sub>D<sub>6</sub>).
